# Supplementary material for: Hm-MyD88 and Hm-SARM: Two key regulators of the neuroimmune system and neural repair in the medicinal leech
Source: PubMed Central journal article supplement (PMC4399414; doi:10.1038/srep09624), 2015-04-16
Supplement: srep09624-s1.pdf [file srep09624-s1.pdf]

***Hm-MyD88* and *Hm-SARM*: Two key regulators of the neuroimmune system and neural repair in the medicinal leech.**

**Rodet F., Tasiemski A., Boidin-Wichlacz C., Van Camp C., Vuillaume C., Slomianny C., Salzet M.**

|                |                                                                                             |    |
|----------------|---------------------------------------------------------------------------------------------|----|
| <i>HmMyD88</i> | -----MAEAMAQYHKLPEKHWKE                                                                     | 18 |
| <i>XtMyD88</i> | -----MACGSSSLGSVDM                                                                          | 12 |
| <i>BbMyD88</i> | -----MATNAPSQDTEGENY---                                                                     | 15 |
| <i>CsMyD88</i> | -----MASFVPMKMDL                                                                            | 10 |
| <i>HsMyD88</i> | -----MAGGPGAGSAAVSSST                                                                       | 17 |
| <i>GgMyD88</i> | -----MATVFGAGSAPGPEPADL                                                                     | 19 |
| <i>SpMyD88</i> | MNFNDLTVKLHLPDGERDCGAVVLSKRPAADSSNRDTQVCDKLSLSCAPAVSALEKATTTLEDGNSGCLLELMAAEIPEKEPKDENINKIE | 90 |
| <i>CfMyD88</i> | -----MAMADIENLIESM                                                                          | 13 |
| <i>ScMyD88</i> | -----MKSRSQSHGLPDLSPNAHY                                                                    | 18 |
| <i>DmMyD88</i> | -----MRPRFVCHQQHSAVSHYQPHSHFHHTHRHPNP PHHHHIYGATDVSYRRYRTAGMVVAEGVMDSGSGSGTGTGIGHF          | 78 |

**Death Domain**

|                |                                                                                            |     |
|----------------|--------------------------------------------------------------------------------------------|-----|
| <i>HmMyD88</i> | CDIPFKSVHHAARAWLSLHLNPERSTFGPENGNLQDWRGVAEELGFVPLQIENFORSHDELSEVMKNLRITKQEAVLGDVLLAIIIRCE  | 106 |
| <i>XtMyD88</i> | NSIFLVALNYNVRHRLSLYLNPNVVA-----AGWTQLAEEEMGYDYLEIKNFERFPDCTMKLLEDWEKCCFRATVGGLEMLKME       | 93  |
| <i>BbMyD88</i> | DSIFARYLGVQTRKKLALWLNPPRVGG-----TNWEDLADEMGHEYLEIENFKLKNSEPMYEVLLHVWSLQQ--NATIGHLIEMLKISIE | 95  |
| <i>CsMyD88</i> | DSVPLTALNVTVRKKLCLYLNPKNTVA-----ADWTAVAEAMDFTYLEIKNYETVRSFMAGVLDWEQARNKDSAVGKLLSIIILKLE    | 91  |
| <i>HsMyD88</i> | SSLPLAALNMRVRRRLSLFLNVRTQVA-----ADWTAIAEEMDFEYLEIIROLETQADETGRLLDAWQGRP--GASVGRLLLELLTKLG  | 97  |
| <i>GgMyD88</i> | HSVPMVALNYGVRRLCLYLNPRATA-----ADWTAIAEKLCHDYLEIRRLAALPDTAALLEEWQSRCPGATVGOLELLRLQLG        | 101 |
| <i>SpMyD88</i> | RSMFATGIGWRRTNLSQYLRPPRPGS-----CDWRDMAEEMGHSYQLHIQNFALSDPVAKVLSAWCTKP--GSNVGKLLDITIEKIE    | 171 |
| <i>CfMyD88</i> | KDVHVNLSLNGCRRIIAMIYLNPECSLIPDSDMFDNWCYMAELLNFSQPEIENMKRHKSEFTEMLHLWSTRNDPPEPKVGNLISFICKLE | 101 |
| <i>ScMyD88</i> | PLTFCSSIDPSAIDPEEIQIRIRRVQVT-----AGIDPEQLAKCLAGLSIAHSSPSRSENSTNSTASPOQT--PSGFSFSKQINHTSNK  | 99  |
| <i>DmMyD88</i> | NETPLSALGIETRTQLSRMLNRKKVLRSEEGYQRDWRGISELAKQKG---FVDENANNPMDLVLIISWSRSPQTAKVGHLEHFLGIIID  | 163 |

|                |                                                                                         |     |
|----------------|-----------------------------------------------------------------------------------------|-----|
| <i>HmMyD88</i> | RYDVLEDFQIMTQLERCKPS--AFSPKFFAELQDENVVGSS-----NDENYWLTVGEADSG-----APEYFNAFVCSSEVD       | 174 |
| <i>XtMyD88</i> | RNDILTLDFGLIEADCMKHLKKNAP---LPLQDDKVDSE-----SEQYRIKSDDPGSGS-----LPETFDAFICYCAQD         | 159 |
| <i>BbMyD88</i> | RFDVLEETQSSLAKDISKYRERSSSP--MPVQVEVSTGNYPNVPTTSELHGITLQDDPYGV-----DKELFDAYVCKED         | 170 |
| <i>CsMyD88</i> | RDDVVEDLRPLIDEDVRRYREKMAER---PLOVEEVDSC---VPRTPMSGITLEDDEPDG-----TPEKFDAFICYCHSD        | 160 |
| <i>HsMyD88</i> | RDDVLELGLPSIEEDCKKYILKQQQEEAEKPLQVAAVDSS---VPRTAELAGITLDDPLGH-----MPERFDAFICYCSD        | 171 |
| <i>GgMyD88</i> | RHDVLELGGVVEEDCKKYLRKQOEAEQFLOVEAVDSS---VFKTSELMGITTRDDPYGH-----GTEMFDAFICYCQKD         | 174 |
| <i>SpMyD88</i> | RHDVHELPAFLEEDCKRWKRTQAEAR--DPIQVEEVTGN--FASTSDLLRGIITLNDSPS-G-----PEMFDAYVCFAMAD       | 244 |
| <i>CfMyD88</i> | RFDVLESDRTMIERDVEKWRQNQLSLQKINDDPTFREPOSRRSPQSEETQTRADVGSKDEI-----YYDCFVLYNFDASDQ       | 178 |
| <i>ScMyD88</i> | SKDLEKCLLESIQ-----KQQFDVFLSFAEAD                                                        | 125 |
| <i>DmMyD88</i> | RWDVCCDDIQENLAKDTQRFIMKQEQRTALVEACEPPPSDCFETNNNYSNNITVGGQSVQILSDEDQRCVQMGPPLRNACVLYAEAD | 253 |

**TIR Domain**

|                |                                                                                             |      |
|----------------|---------------------------------------------------------------------------------------------|------|
|                | Box2      Box3                                                                              | Box1 |
| <i>HmMyD88</i> | LTIVKNNMTELEDKQFF--KLCIPDRDFLPGP-PKYEATTKLIQARCDKFIIVVLSPDFLKSDECAFMNLNVALALNFSARKKLIPIIYK  | 260  |
| <i>XtMyD88</i> | ISFVQEMISRLSEQTDYK--LKLQVDRDVLPGT-CLWSTISELIEHRCKRMVVIISDDYLSSECDFOQTKFALSSEGARFKRLIIPVKYK  | 246  |
| <i>BbMyD88</i> | RDFVIQMKRLESSEFGRRLLKLCIDDRDLLPGT-AYLTVTAELIENRCKRMVVVLSPEFLESPECDFQTKFALSSEGAKRRLIIPVMYK   | 259  |
| <i>CsMyD88</i> | LEFVHEMIRQLENSNYK--LKLQVDRDVLPGS-CVWTTITSELIEQRCRMMVVVISEDYLDSEACDFQTKFALSSEGAEKRLIIPVYK    | 247  |
| <i>HsMyD88</i> | IQFVQEMIRQLEQTYNR--LKLQVSDRDVLPGT-CVWSIASELIEKRCRMMVVVSDDYLSQKEDCFQTKFALSSEGAGHOKRLIIPKYK   | 258  |
| <i>GgMyD88</i> | LOFVQEMIRLEQTEFK--LKLQVDRDVLPGT-CVWSISGELIEKRCRMMVVVSDDYLSSECDFOQTKFALSSEGARFKRLIIPVKCK     | 261  |
| <i>SpMyD88</i> | LEFVQQLRSQLESEPHN--YKLCIDDRDLLPGG-SHALVTAETIKNRCNKMLVLSPEFLQSPSCDFQTKFAVSLSEFARKRRIIPILVK   | 331  |
| <i>CfMyD88</i> | LEFVKQMSRILEGPEYN--FRLFLWRDLDVGT-AMHSVSAAIIEKKCRRCIVVLSKSEFNNSPAADFOQKFAHALSEGARKRVIPIVIE   | 265  |
| <i>ScMyD88</i> | ERFAEEVQRRLIENAGVR--VFVPSAGLMSDR-AFHQETADIKQGCRTRVVILSPDYLSSSWCGYEANLAFTNSPDARNTTIPILYR     | 211  |
| <i>DmMyD88</i> | IDHATEIMNNESEERYN--LRLFLRHRDMLMGVPEFHVQLSHFMATRCHLIVVLIIEEFLRSPPENTYLVNFTQKIQIENHTRKLIPIIYK | 341  |

→RDxLPGx←

|                |                                                                                              |     |
|----------------|----------------------------------------------------------------------------------------------|-----|
| <i>HmMyD88</i> | RCE--IPPTLSFITLVDFTRG-----DVIGFWNRLSKSLITTGCLNTIISSSPSLPSLKDFOPTSQDTIVITLTKTKPRPGEFLEVEKGPMS | 343 |
| <i>XtMyD88</i> | PMKRPFPSILRFITLVDYTNP-----CTKGFWFERLAKALS-----                                               | 283 |
| <i>BbMyD88</i> | QIE--VPQILRFVTVIDYVKE-----ELEERFWHRLSKALS-----                                               | 295 |
| <i>CsMyD88</i> | PMKKPFPRILRYITVCDYTRQ-----STQAFWDRLAKSLSLP-----                                              | 285 |
| <i>HsMyD88</i> | AMKKEFPSILRFITVCDYTNP-----CTKSFWFWRLAKALS-----                                               | 296 |
| <i>GgMyD88</i> | TMKNEFPSILRFITLVDYTNP-----CTKKFWFWRLAKSLSLP-----                                             | 299 |
| <i>SpMyD88</i> | PCD--LPLILRHITLVDYTRQ-----DLRPLWDRIRKAMSIR-----                                              | 367 |
| <i>CfMyD88</i> | NIE--PPSILNFWAPAFYNY-----GIRDWQWRVAATIKSELRPDPEIWLPKVDANNIALDTSVITKRELWGITVATQIYPEEDFVGI     | 348 |
| <i>ScMyD88</i> | PCE--VPAFLSHLHYLDYPRFKDDRKNCDQYFWFKRLYKSVTHHI-----                                           | 253 |
| <i>DmMyD88</i> | TDMH--IPQTLGIYTHIKYAGD-----SKLNFWDKRLARS-----                                                | 425 |

|                |                                                                                         |     |
|----------------|-----------------------------------------------------------------------------------------|-----|
| <i>HmMyD88</i> | ILGSSAGEDSGKEMSESAAVQPTKEEEFIDVSTEVVSVSHISYKFFSFTQCCKSSSK-----                          | 402 |
| <i>XtMyD88</i> | -----                                                                                   |     |
| <i>BbMyD88</i> | -----                                                                                   |     |
| <i>CsMyD88</i> | -----                                                                                   |     |
| <i>HsMyD88</i> | -----                                                                                   |     |
| <i>GgMyD88</i> | -----                                                                                   |     |
| <i>SpMyD88</i> | -----                                                                                   |     |
| <i>CfMyD88</i> | PDVDAQRKKHKNKNNKGRGE-----                                                               | 367 |
| <i>ScMyD88</i> | -----                                                                                   |     |
| <i>DmMyD88</i> | KVPEAETTIVSVSGDTGSPLEPKPKKKDRFLRRITHSFGKTARSDGASGKTLRHAHSVSTINVTERERTLSASSNISTTSESKSFIK | 515 |

|                | % Identity | % Similarity |
|----------------|------------|--------------|
| <i>HmMyD88</i> | -          | -            |
| <i>XtMyD88</i> | 36         | 53           |
| <i>BbMyD88</i> | 34         | 52           |
| <i>CsMyD88</i> | 33         | 53           |
| <i>HsMyD88</i> | 32         | 51           |
| <i>GgMyD88</i> | 32         | 50           |
| <i>SpMyD88</i> | 26         | 42           |
| <i>CfMyD88</i> | 23         | 42           |
| <i>ScMyD88</i> | 21         | 41           |
| <i>DmMyD88</i> | 18         | 37           |

**Supplementary Material 1: Comparison of the amino acid sequence of *Hirudo medicinalis* MyD88 (*HmMyD88*) with vertebrate and invertebrate MyD88 orthologs.**

Alignment was generated by using the program CLUSTAL W. Identical residues with *HmMyD88* are shaded in black, homologous residues in grey. Gaps (-) were introduced to optimize sequence alignment. →RDxLPGx← indicates the key motif for MyD88 dimerization and its interaction with TLRs. Accession numbers in EMBL/Genbank: *XtMyD88*: *Xenopus tropicalis* (NP\_001016837); *BbMyD88*: *Branchiostoma belcheri* (ABQ32299); *CsMyD88*: *Cynoglossus semilaevis* (ACU31062.1); *HsMyD88*: *Homo sapiens* (Q99836.1); *GgMyD88*: *Gallus gallus* (A5HNF6.1); *SpMyD88*: *Strongylocentrotus purpuratus* (XP\_780590); *CfMyD88*: *Chlamys farreri* (ABB76627); *SdMyD88*: *Suberites domuncula* (Q4W1E7); *DmMyD88*: *Drosophila melanogaster* (NP\_610479).

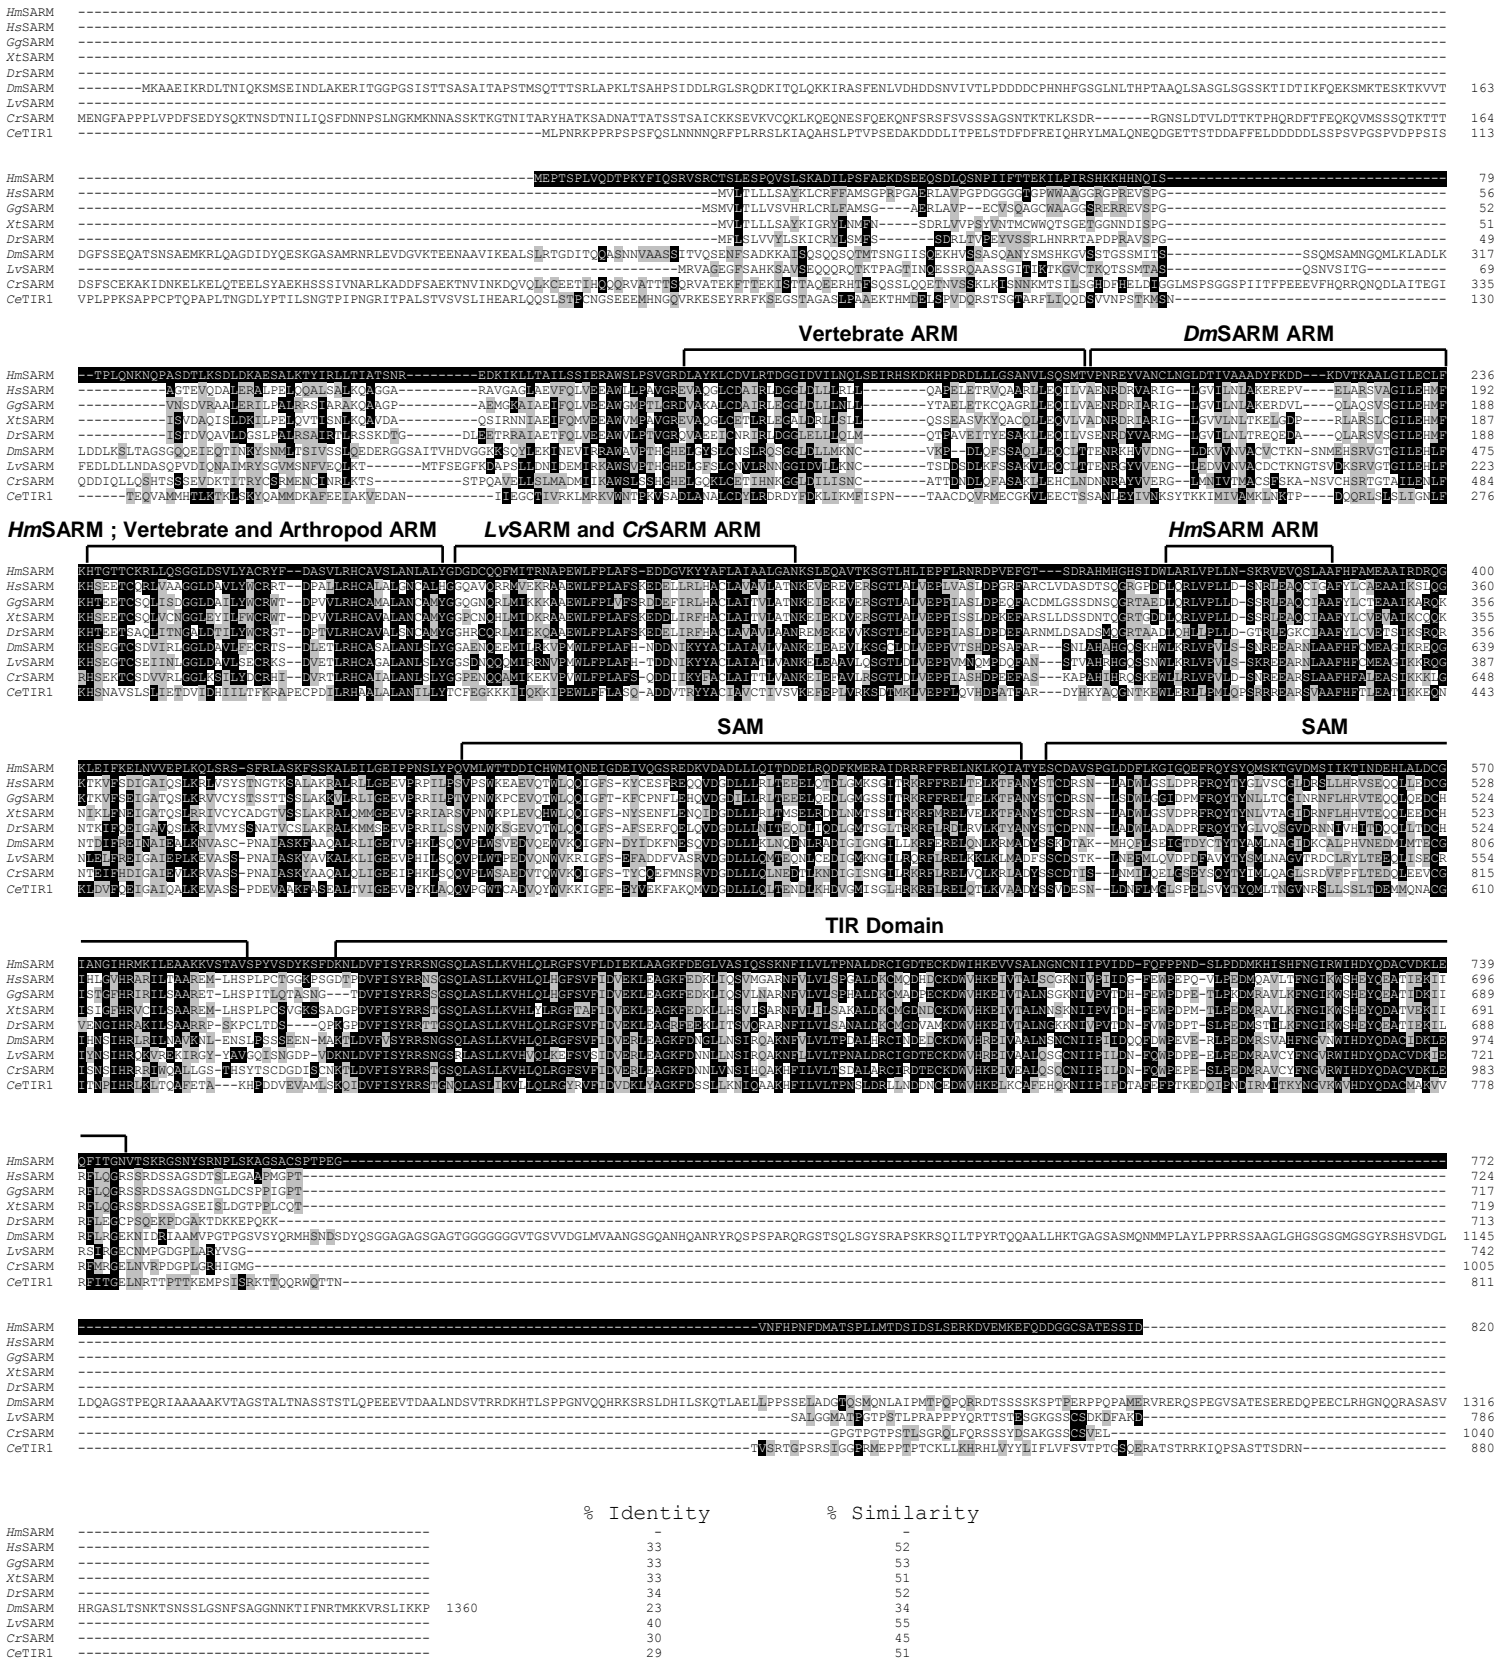

**Supplementary Material 2: Comparison of the amino acid sequence of *Hirudo medicinalis* SARM (*Hm-SARM*) with vertebrate and invertebrate SARM orthologs.**

Alignment was generated by using the program CLUSTAL W. Identical residues with *HmSARM* are shaded in black, homologous residues in grey. Gaps (-) were introduced to optimize sequence alignment. Accession numbers in EMBL/Genbank: *HsSARM*: *Homo sapiens* (Q6SZW1); *GgSARM*: *Gallus gallus* (A5HNF6.1); *XtSARM*: *Xenopus tropicalis* (XM\_002937143.2); *DrSARM*: *Danio rerio* (B3DK97); *DmSARM*: *Drosophila melanogaster* (Q6IDD9); *LvSARM*: *Litopenaeus vannamei* (G8GV23); *CrSARM*: *Carcinoscorpius rotundicauda* (A9X3T4); *CeTIR-1*: *Caenorhabditis elegans* (Q86DA5).

| <i>H. medicinalis myd88</i> |                   |                   |              |  |
|-----------------------------|-------------------|-------------------|--------------|--|
| Intron                      | 5'-Donor          | 3'-Donor          | Intron phase |  |
| 1                           | G gtatgtg<br>Glu  | tttcag AA<br>Glu  | 1            |  |
| 2                           | G gttaac<br>Val   | aattaag TT<br>Val | 1            |  |
| 3                           | G gtgcgta<br>Ala  | tttttag CT<br>Ala | 1            |  |
| 4                           | AG gtaggtc<br>Arg | ttatcag G<br>Arg  | 2            |  |
| 5                           | A gtaagtc<br>Ser  | tatttag GT<br>Ser | 1            |  |

**Deuterostoma  
Vertebrates**

**Protostoma  
Ecdyzozoa**

| <i>H. sapiens myd88</i> |                   |                  |              |                                     |
|-------------------------|-------------------|------------------|--------------|-------------------------------------|
| Intron                  | 5'-Donor          | 3'-Donor         | Intron phase | <i>H. medicinalis</i> I/E junctions |
| 1                       | G ataaaa<br>Glu   | cccaca AG<br>Glu | 1            |                                     |
| 2                       | G gtaaggg<br>Gly  | caccac GG<br>Gly | 1*           | i3                                  |
| 3                       | AG gttggct<br>Arg | cccctag G<br>Arg | 2*           | i4                                  |
| 4                       | G gtaagct<br>Gly  | cttcag GT<br>Gly | 1*           | i5                                  |

| <i>D. melanogaster myd88</i> |                       |                    |              |                                     |
|------------------------------|-----------------------|--------------------|--------------|-------------------------------------|
| Intron                       | 5'-Donor              | 3'-Donor           | Intron phase | <i>H. medicinalis</i> I/E junctions |
| 1                            | G gtaggca<br>Ala      | tcaaag CC<br>Ala   | 1            |                                     |
| 2                            | AGG<br>gtgagtg<br>Arg | cttacag CTA<br>Leu | 3            |                                     |
| 3                            | G gtgagta<br>Glu      | tccccag AG<br>Glu  | 1*           | i4                                  |
| 4                            | AC gtaagt<br>Thr      | tatgcag T<br>Thr   | 1            |                                     |

| <i>D. rerio myd88</i> |                   |                   |              |                                     |
|-----------------------|-------------------|-------------------|--------------|-------------------------------------|
| Intron                | 5'-Donor          | 3'-Donor          | Intron phase | <i>H. medicinalis</i> I/E junctions |
| 1                     | G gtacgtc<br>Asp  | tgacag AT<br>Asp  | 1*           | i1                                  |
| 2                     | G gtcagtg<br>Gly  | tcaacag GA<br>Gly | 1*           | i3                                  |
| 3                     | AG gcatgtt<br>Arg | ttcttag G<br>Arg  | 2*           | i4                                  |
| 4                     | G gtacaaa<br>Gly  | ttctcag GA<br>Gly | 1*           | i5                                  |

| <i>L. vannamei myd88</i> |                   |                    |              |                                     |
|--------------------------|-------------------|--------------------|--------------|-------------------------------------|
| Intron                   | 5'-Donor          | 3'-Donor           | Intron phase | <i>H. medicinalis</i> I/E junctions |
| 1                        | AG gtgaata<br>Arg | tttacag A<br>Arg   | 2            |                                     |
| 2                        | T gtaatat<br>Tyr  | tttacag AT<br>Tyr  | 1*           | i1                                  |
| 3                        | G gtaagga<br>Asp  | attgcag AT<br>Asp  | 1*           | i3                                  |
| 4                        | AAG gtaagt<br>Lys | cttcag CTG<br>Leu  | 3            |                                     |
| 5                        | AG gtaacgt<br>Ser | cttcag C<br>Ser    | 2            |                                     |
| 6                        | GAT gtaagt<br>Asp | tcagcag TCT<br>Ser | 3            |                                     |

| <i>G. gallus myd88</i> |                   |                   |              |                                     |
|------------------------|-------------------|-------------------|--------------|-------------------------------------|
| Intron                 | 5'-Donor          | 3'-Donor          | Intron phase | <i>H. medicinalis</i> I/E junctions |
| 1                      | G gtgagcc<br>Glu  | tttcag AG<br>Glu  | 1            |                                     |
| 2                      | G gtgagtg<br>Gly  | cttacag GG<br>Gly | 1*           | i3                                  |
| 3                      | AG gtgagtg<br>Arg | tctgaag G<br>Arg  | 2*           | i4                                  |
| 4                      | G gtaagat<br>Gly  | cttcag GG<br>Gly  | 1*           | i5                                  |

| <i>X. tropicalis myd88</i> |                      |                   |              |                                     |
|----------------------------|----------------------|-------------------|--------------|-------------------------------------|
| Intron                     | 5'-Donor             | 3'-Donor          | Intron phase | <i>H. medicinalis</i> I/E junctions |
| 1                          | G gtaagta<br>Glu     | gttacag AG<br>Glu | 1*           | i1                                  |
| 2                          | G gtacgcc<br>Gly     | cttacag GG<br>Gly | 1*           | i3                                  |
| 3                          | CG<br>gtaaggg<br>Arg | gttatag G<br>Arg  | 2*           | i4                                  |
| 4                          | G gtaagat<br>Gly     | cttacag GG<br>Gly | 1*           | i5                                  |

**Supplementary Material 3: Intron-exon boundaries of the leech, vertebrates and ecdyzozoa *myd88* genes.**

The sequence of each of the intron-exon boundaries is shown, as well as the codons for the amino acid residues. Uppercase and lowercase letters represent nucleotides in the exons and introns, respectively. Asterisks (\*) indicate that the position of an intron-exon junction is the same in leech and a vertebrate or an ecdyzozoa gene. The column entitled “*H. medicinalis* I/E junctions” point out which leech intron-exon junction is conserved in vertebrate or ecdyzozoa genes.

| <i>H. Medicinalis sarm</i> |                    |                    |              |
|----------------------------|--------------------|--------------------|--------------|
| Intron                     | 5'-Donor           | 3'-Donor           | Intron phase |
| 1                          | CAG gtatcac        | gtttcag GGT        | -            |
| 2                          | GAG gttcgaa<br>Glu | aattcag ATT<br>Ile | 3*           |
| 3                          | CAG gtgatat<br>Gln | attttag AAT<br>Asn | 3            |
| 4                          | AG gtctgtg<br>Arg  | gttttag A<br>Arg   | 2*           |
| 5                          | A gttggca<br>Lys   | cttttag AG<br>Lys  | 1*           |
| 6                          | AG gtgaatg<br>Ser  | atcaaag T<br>Ser   | 2*           |
| 7                          | AAG gtaaaat<br>Lys | tttccag GAG<br>Glu | 3*           |
| 8                          | AG gttcatg<br>Arg  | ggtgcag A<br>Arg   | 2*           |

| <i>H. Sapiens sarm</i> |                    |                    |              |
|------------------------|--------------------|--------------------|--------------|
| Intron                 | 5'-Donor           | 3'-Donor           | Intron phase |
| 1                      | CG gtgagcg<br>Arg  | tgggcag A<br>Arg   | 2            |
| 2                      | AAG gtgggtg<br>Lys | tccctag GTG<br>Val | 3 *          |
| 3                      | CGG gtagagt<br>Arg | ccccag GAG<br>Glu  | 3            |
| 4                      | AG gtacgga<br>Arg  | ggtgcag G<br>Arg   | 2*           |
| 5                      | G gtcagcc<br>Glu   | actcag AA<br>Glu   | 1*           |
| 6                      | AG gtgagga<br>Ser  | cttgcag T<br>Ser   | 2*           |
| 7                      | AAG gtaggtg<br>Lys | tctccag GAG<br>Glu | 3*           |
| 8                      | AA gtgagcc<br>Lys  | cccacag G<br>Lys   | 2*           |

**Supplementary Material 4: Intron-exon boundaries of the leech and human *sarm* genes.**

The sequence of each of the intron-exon boundaries is shown, as well as the codons for the amino acid residues. Uppercase and lowercase letters represent nucleotides in the exons and introns, respectively. Asterisks (\*) indicate that the position of an intron-exon junction is the same in leech and human genes and has the same intron phasing.

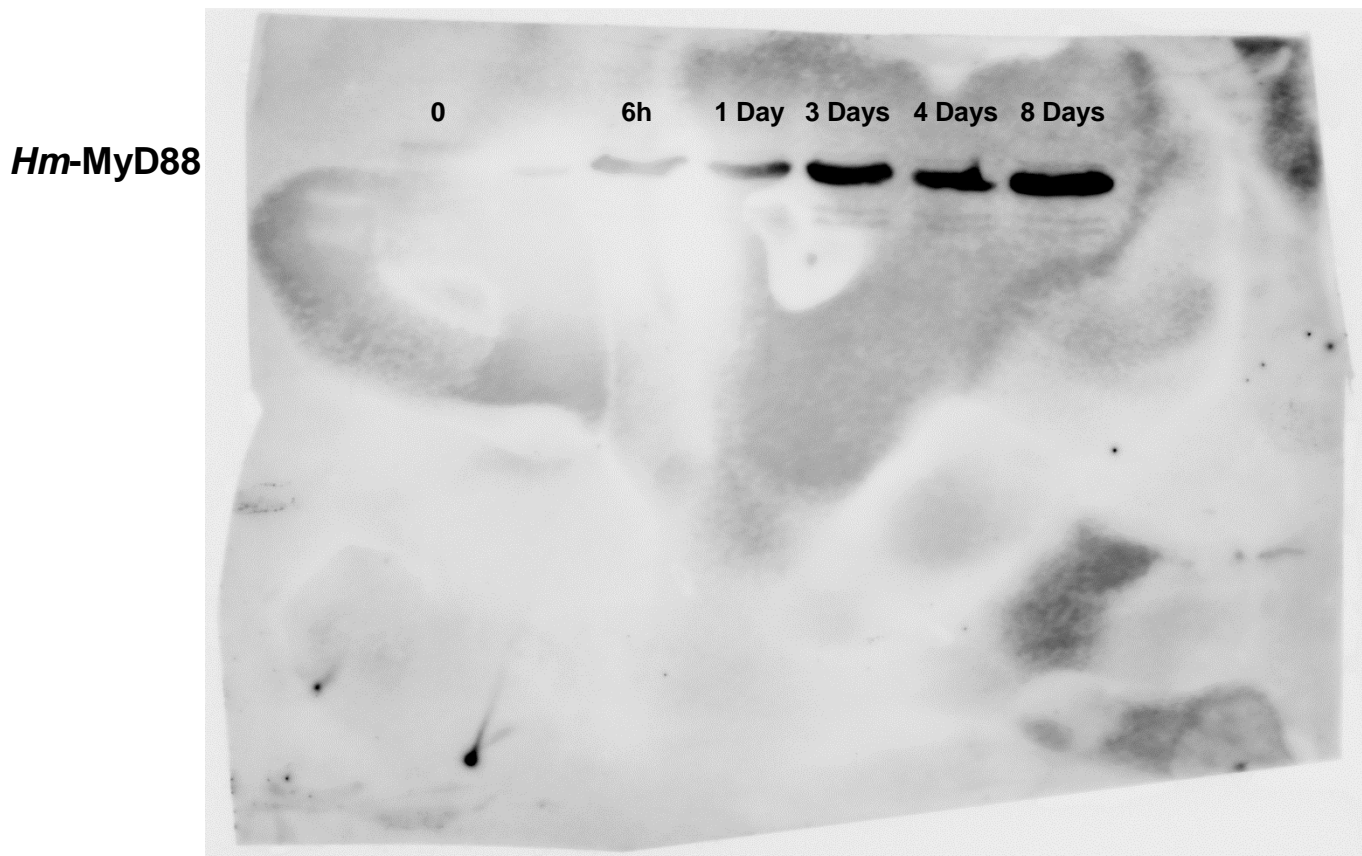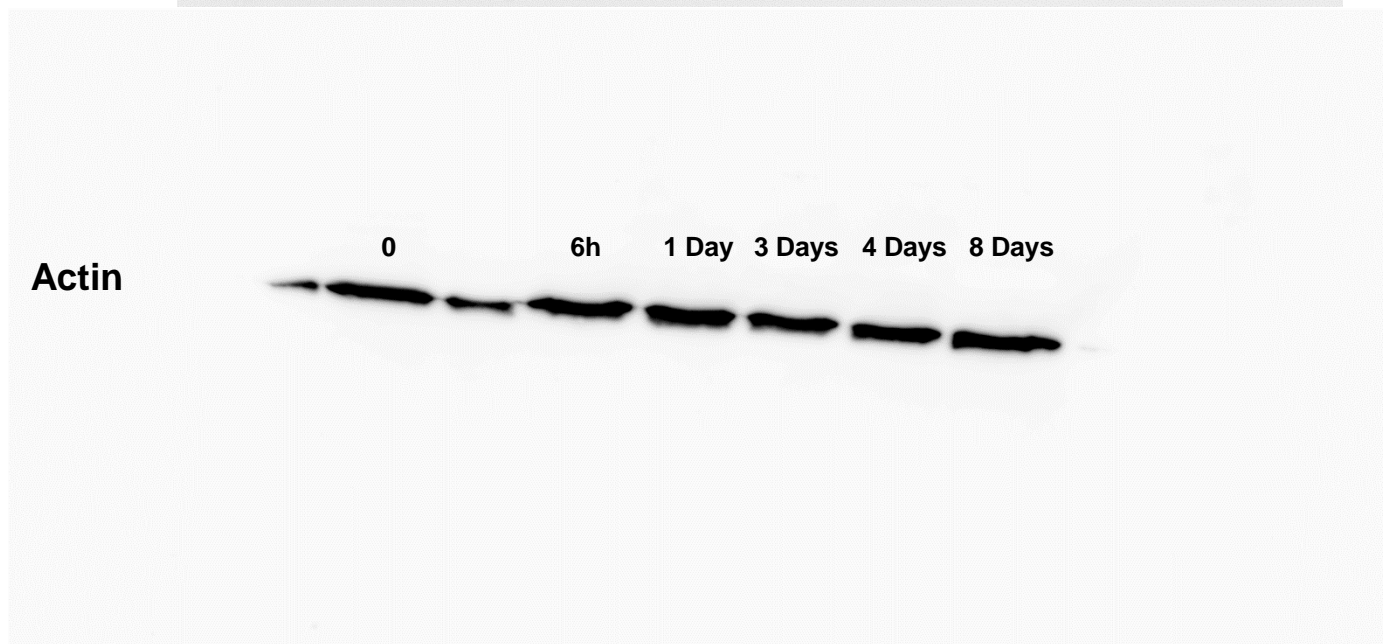

**Supplementary Material 5: Unprocessed original scans for the blots in figure 10 (A) Kinetics of expression in the course of neural regeneration.**

*Hm-MyD88* protein expression was assessed by western blot in isolated nerve cords cultured *ex vivo* for up to 8 days under sterile conditions. Samples were collected at 0 h (T0), 6 h, 1 day, 3 days and 8 days. Membrane was incubated with anti-*Hm-MyD88*. To assess that an equal amount of proteins was loaded on gels, membrane was stripped and re probed with anti-Actin.

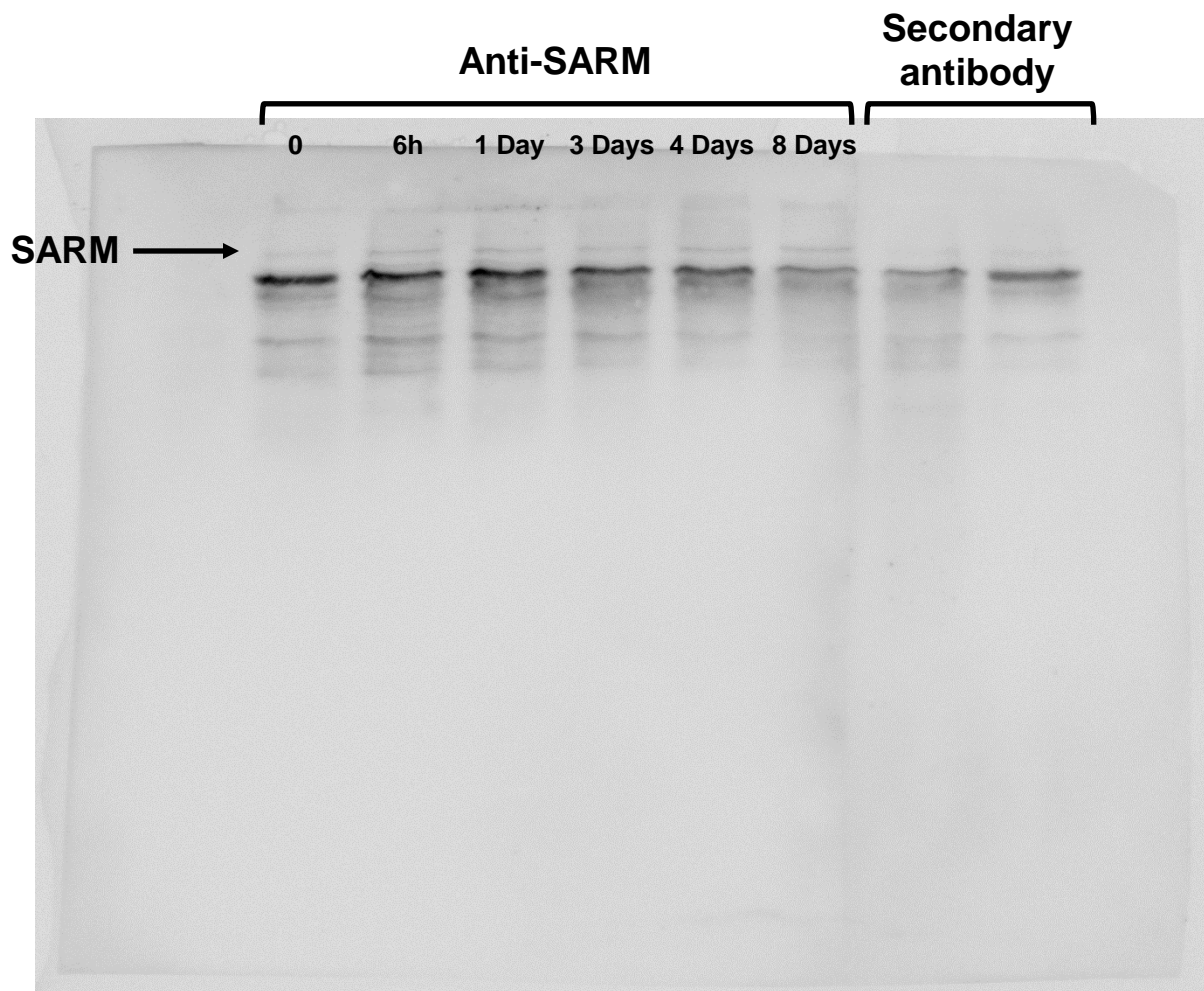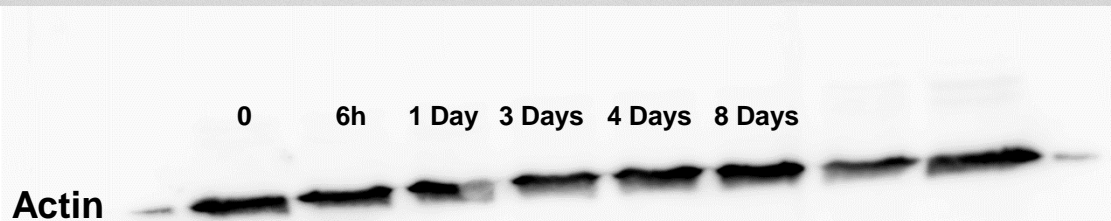

**Supplementary Material 6: Unprocessed original scans for the blots in figure 10 (B) Kinetics of expression in the course of neural regeneration.**

*Hm*-SARM protein expression was assessed by western blot in isolated nerve cords cultured *ex vivo* for up to 8 days under sterile conditions. Samples were collected at 0 h (T0), 6 h, 1 day, 3 days and 8 days. Membrane was incubated with anti-SARM. As a control, a membrane was incubated with the secondary antibody alone. To assess that an equal amount of proteins was loaded on gels, membrane was stripped and reprobed with anti-Actin.
